1 **Evidence of neutralizing antibodies against SARS-CoV-2 in domestic cats living with**  
2 **owners with a history of COVID-19 in Lima – Peru**

3 Luis M. Jara<sup>a\*</sup>, Cusi Ferradas<sup>b</sup>, Francesca Schiaffino<sup>a</sup>, Camila Sánchez-Carrión<sup>c</sup>, Ana  
4 Martínez<sup>d</sup>, Alexandra Ulloa<sup>c</sup>, Gisela Isasi-Rivas<sup>e</sup>, Angela Montalván<sup>e</sup>, Luis Guevara  
5 Sarmiento<sup>e</sup>, Manolo Fernández<sup>e</sup>, Mirko Zimic<sup>f</sup>

6

7 <sup>a</sup> Facultad de Medicina Veterinaria y Zootecnia, Universidad Peruana Cayetano Heredia,  
8 Lima, Peru

9 <sup>b</sup> Unidad de Investigación en Enfermedades Emergentes y Cambio Climático (Emerge),  
10 Facultad de Salud Pública y Administración, Universidad Peruana Cayetano Heredia, Lima,  
11 Peru

12 <sup>c</sup> Clínica Veterinaria Gatuario, Lima, Peru

13 <sup>d</sup> Clínica Veterinaria Los Dominicos, Lima, Peru

14 <sup>e</sup> Farmacológicos Veterinarios (FARVET), Chincha, Peru

15 <sup>f</sup> Laboratorio de Bioinformática, Biología Molecular y Desarrollos Tecnológicos, Universidad  
16 Peruana Cayetano Heredia, Lima, Peru

17

18 **\*Corresponding author:** Facultad de Medicina Veterinaria y Zootecnia, Universidad  
19 Peruana Cayetano Heredia, Av. Honorio Delgado 430, San Martín de Porres, Lima, Peru.

20 E-mail address: [luis.jara.s@upch.pe](mailto:luis.jara.s@upch.pe) (Luis M. Jara).

21

22

23

24

25

26 **Abstract**

27 SARS-CoV-2 can infect a variety of wild and domestic animals worldwide. Of these,  
28 domestic cats are highly susceptible species and potential viral reservoirs. As such, it is  
29 important to investigate disease exposure in areas with active community transmission and  
30 high disease prevalence. In this report we demonstrate the presence of serum neutralizing  
31 antibodies against the receptor binding-domain (RBD) of the SARS-CoV-2 in cats whose  
32 owners had been infected with SARS-CoV-2 in Lima, Peru, using a commercial competitive  
33 ELISA SARS-CoV-2 Surrogate Virus Neutralization Test. Out of 41 samples, 17.1% (7/41)  
34 and 31.7% (13/41) were positive, using the cut-off inhibition value of 30% and 20%,  
35 respectively. Not all cats living in a single house had detectable neutralizing antibodies  
36 showing that heterogenous exposure and immune among cohabiting animals. This is the  
37 first report of SARS-COV-2 exposure of domestic cats in Lima, Peru. Further studies are  
38 required to ascertain the prevalence of SARS-COV-2 exposure among domestic cats of  
39 Lima, Peru.

40

41 **Key words:** COVID-19, SARS-CoV-2, cats, serology, neutralizing antibodies, One Health

42

43

44

45

46

47

48

49

50

51

52

53

## 54 **Introduction**

55           The new human coronavirus, SARS-CoV-2, has been shown to mainly infect  
56 humans. However, SARS-CoV-2 infection has also been detected in a variety of animals,  
57 including wild cats, minks, ferrets, domestic dogs and cats [1-6]. Cats and minks may be  
58 considered the most susceptible species because of the higher similarity of the angiotensin-  
59 converting enzyme 2 (ACE2) between these species and humans [7]. Although the majority  
60 of infected cats are asymptomatic, some animals may develop clinical disease, and the virus  
61 can be experimentally transmitted between individuals [8]. Therefore, SARS-CoV-2 could  
62 have a direct impact on animal health, while the possibility of cats becoming zoonotic  
63 reservoirs has not been totally discarded.

64           Serological testing is a valuable tool for screening antibody levels associated with  
65 pathogen exposure. As with other viral infections, host neutralizing serum antibodies may  
66 block the binding of viral proteins to cell surface receptors. In humans, SARS-CoV-2  
67 neutralizing antibodies have been determined to inversely correlate with disease severity  
68 and can predict the probability of re-infections [9]. In animals, reported prevalence of  
69 neutralizing serum antibodies against SARS-CoV-2 in cats varies, with as low as 0.002% in  
70 Germany, 0.2% in Brazil, 5.8% in Italy, and 10.8% in Wuhan, China [10-13]. In Peru, one of  
71 the most affected countries by the COVID-19 pandemic, no previous studies have been  
72 conducted investigating the seroprevalence or prevalence of SARS-CoV-2 among domestic  
73 cats. In this report we demonstrate the presence of serum neutralizing antibodies against the  
74 receptor binding-domain (RBD) of the SARS-CoV-2 viral spike protein in cats whose owners  
75 confirmed previous infection with SARS-CoV-2.

76

## 77 **Materials and Methods**

78 Blood samples of cats were collected between August 2020 and April 2021 from  
79 veterinary centers located in Lima, Peru. All cat owners signed an informed consent  
80 authorizing the use of the samples for research purposes. Samples were centrifuged at 3500  
81 rpm for 5 minutes and the serum supernatant was transferred to microcentrifuge tubes and  
82 was stored at -20°C. Samples from cats whose owners confirmed previous COVID-19  
83 disease (clinical signs with positive IgG/IgM rapid test or qRT-PCR) during veterinary  
84 anamnesis were conveniently selected. To test the serum samples for the presence of  
85 neutralizing antibodies against the RBD of the viral spike protein, a commercial competitive  
86 ELISA SARS-CoV-2 Surrogate Virus Neutralization Test (sVNT) was used (Genscript, New  
87 Jersey, USA) according to the manufacturer's instructions. Percent serum neutralization was  
88 calculated as follows:  $= (1 - \text{OD value of sample} / \text{OD value of negative control}) \times 100\%$ . A  
89 cut-off value of 20% and an updated 30% of inhibition were used to establish positivity. The  
90 study was approved by the Universidad Peruana Cayetano Heredia Animal Care and Use  
91 Ethical Committee (N° 027-08-20).

92

## 93 **Results and Discussion**

94 A total of 41 samples from a serum bank of 700 were selected for screening of serum  
95 neutralizing antibodies. The median age of the animals was 12 months (IQR: 8 months – 46  
96 months), 53.7% were female (22/41), and 87.8 % (36/41) were classified as domestic  
97 shorthair. 53.7% (22/41) came from the district of Comas while the remainder 46.3% came  
98 from Miraflores (5/41), Surco (5/41), San Juan de Miraflores (3/41), Independencia (2/41),  
99 San Juan de Lurigancho (1/41), San Luis (1/41), and San Martín de Porres (1/41). Out of the  
100 41 cat samples, 22 cats (53.7%) lived in a single household (household C) in which cats  
101 were sampled on two different dates, and 2 cats lived in household D. Age, sex, breed, and  
102 district of all animals are shown in **Supplementary Table 1**. Out of the 41 samples, 17.1%  
103 (7/41) and 31.7% (13/41) were positive for the presence of serum neutralizing antibodies,  
104 using the cut-off value of 30% and 20%, respectively (**Figure 1**). Out of 13 positive samples,

105 38.4% (5/13) showed clinical signs including sneezing and dyspnea, cough, vomit, or  
106 depression. Interestingly, one of the animals with the highest percent neutralization (73.06%)  
107 showed all the symptoms described. Only 8 out 22 cats in household C had evidence of  
108 serum neutralizing antibodies. This suggests that infection may not be homogenous among  
109 cohabiting animals, and this could be associated with other factors such as health state,  
110 immunity, proximity to the infected owner(s), among others.

111 Our results show compelling evidence of SARS-CoV-2 exposure in domestic cats  
112 and it is the first report of such an event in Peru. Percent seropositivity in this population of  
113 cats is high compared to other studies published, such as that of Italy and Wuhan, China, in  
114 which 5.8% of 191 cats 10.8% of 102 cats had neutralizing antibodies, respectively [12, 13].  
115 However, these studies were not exclusively done on a pet population living with COVID-19  
116 infected owners. In a longitudinal cohort study of pets living with COVID-19 owners, 43.8% of  
117 16 cats developed neutralizing antibodies against SARS-CoV-2 [14]. Limited sample size  
118 and a convenience sample do not permit prevalence estimation.

119 Serum neutralization activity is commonly tested using plaque reduction  
120 neutralization tests. However, the commercial assay utilized in this preliminary study has  
121 shown a high correlation with serum neutralization activity using plaque reduction and has  
122 shown robust internal validity parameters for both humans, cats, dogs and hamster sera [15,  
123 16]. Additionally, this commercial assay offers logistical and biosafety advantages for  
124 researchers working in resource-limited settings that do not have access to a BSL-3  
125 containment required for SARS-CoV-2 manipulation.

126 These animals sought routine veterinary care that was not associated with  
127 symptomatic respiratory disease in most of the cases, demonstrating potential asymptomatic  
128 infection in cats, and consequently, potential viral reservoirs. In one study, over 25% of  
129 households sampled had pets with neutralizing antibodies. Few case studies of natural  
130 infection in cats document severe clinical outcomes, and those that have revealed that co-  
131 morbidities likely played a contributing factor in illness or death [14].

132

133 **Conclusions**

134 It is crucial to monitor SARS-CoV-2 exposure and infection in domestic animals using  
135 rapid and affordable point-of-care serological and molecular assays that can be used by  
136 veterinarians serving low-income communities. Cats have the potential to serve as sentinels  
137 for undetected community transmission, and in this scenario, veterinarians play a key role as  
138 first-line responders.

139

140 **Ethics Statement**

141 The authors confirm that the ethical policies of the journal, as noted on the journal's  
142 author guidelines page, have been adhered to and the appropriate ethical review committee  
143 approval has been received.

144

145 **Acknowledgements**

146 Partial funding was received by D43TW007393 from the Emerging Diseases and  
147 Climate Change Research Unit (Emerge), Universidad Peruana Cayetano Heredia, Lima,  
148 Peru. We would like to acknowledge Dr. Macarena Llalla for helping with the collection of cat  
149 serum samples, as well as all other Veterinary supportive staff.

150

151 **Conflict of interests**

152 None noted.

153

## 154 **References**

- 155 1. Bertzbach LD, Vladimirova D, Dietert K, Abdelgawad A, Gruber AD, Osterrieder N, et  
156 al. SARS-CoV-2 infection of Chinese hamsters (*Cricetulus griseus*) reproduces COVID-19  
157 pneumonia in a well-established small animal model. *Transboundary and Emerging*  
158 *Diseases*. 2020. doi: 10.1111/tbed.13837.
- 159 2. Mahdy MAA, Younis W, Ewaida Z. An Overview of SARS-CoV-2 and Animal  
160 Infection. *Frontiers in Veterinary Science*. 2020;7. doi: 10.3389/fvets.2020.596391.
- 161 3. Oude Munnink BB, Sikkema RS, Nieuwenhuijse DF, Molenaar RJ, Munger E,  
162 Molenkamp R, et al. Transmission of SARS-CoV-2 on mink farms between humans and  
163 mink and back to humans. *Science*. 2021;371(6525):172-7. doi: 10.1126/science.abe5901.
- 164 4. Shi J, Wen Z, Zhong G, Yang H, Wang C, Huang B, et al. Susceptibility of ferrets,  
165 cats, dogs, and other domesticated animals to SARS-coronavirus 2. *Science*.  
166 2020;368(6494):1016-20. doi: 10.1126/science.abb7015. PubMed PMID: 32269068;  
167 PubMed Central PMCID: PMCPMC7164390.
- 168 5. Sit THC, Brackman CJ, Ip SM, Tam KWS, Law PYT, To EMW, et al. Infection of dogs  
169 with SARS-CoV-2. *Nature*. 2020;586(7831):776-8. Epub 2020/05/15. doi: 10.1038/s41586-  
170 020-2334-5. PubMed PMID: 32408337; PubMed Central PMCID: PMCPMC7606701.
- 171 6. Wang L, Mitchell PK, Calle PP, Bartlett SL, McAloose D, Killian ML, et al. Complete  
172 Genome Sequence of SARS-CoV-2 in a Tiger from a U.S. Zoological Collection.  
173 *Microbiology Resource Announcements*. 2020;9(22). doi: 10.1128/mra.00468-20.
- 174 7. Sreenivasan CC, Thomas M, Wang D, Li F. Susceptibility of livestock and companion  
175 animals to COVID-19. *J Med Virol*. 2021;93(3):1351-60. Epub 2020/10/23. doi:  
176 10.1002/jmv.26621. PubMed PMID: 33090532.
- 177 8. Halfmann PJ, Hatta M, Chiba S, Maemura T, Fan S, Takeda M, et al. Transmission  
178 of SARS-CoV-2 in Domestic Cats. *N Engl J Med*. 2020. doi: 10.1056/NEJMc2013400.  
179 PubMed PMID: 32402157.

- 180 9. Chen X, Pan Z, Yue S, Yu F, Zhang J, Yang Y, et al. Disease severity dictates  
181 SARS-CoV-2-specific neutralizing antibody responses in COVID-19. *Signal Transduction*  
182 *and Targeted Therapy*. 2020;5(1). doi: 10.1038/s41392-020-00301-9.
- 183 10. Dias HG, Resck MEB, Caldas GC, Resck AF, Da Silva NV, Dos Santos AMV, et al.  
184 Neutralizing antibodies for SARS-CoV-2 in stray animals from Rio de Janeiro, Brazil. *PLOS*  
185 *ONE*. 2021;16(3):e0248578. doi: 10.1371/journal.pone.0248578.
- 186 11. Michelitsch A, Hoffmann D, Wernike K, Beer M. Occurrence of Antibodies against  
187 SARS-CoV-2 in the Domestic Cat Population of Germany. *Vaccines*. 2020;8(4):772. doi:  
188 10.3390/vaccines8040772.
- 189 12. Patterson EI, Elia G, Grassi A, Giordano A, Desario C, Medardo M, et al. Evidence of  
190 exposure to SARS-CoV-2 in cats and dogs from households in Italy. *Nat Commun*.  
191 2020;11(1):6231. Epub 2020/12/06. doi: 10.1038/s41467-020-20097-0. PubMed PMID:  
192 33277505; PubMed Central PMCID: PMC7718263.
- 193 13. Zhang Q, Zhang H, Gao J, Huang K, Yang Y, Hui X, et al. A serological survey of  
194 SARS-CoV-2 in cat in Wuhan. *Emerg Microbes Infect*. 2020;9(1):2013-9. Epub 2020/09/02.  
195 doi: 10.1080/22221751.2020.1817796. PubMed PMID: 32867625; PubMed Central PMCID:  
196 PMC7534315.
- 197 14. Hamer SA, Pauvolid-Corrêa A, Zecca IB, Davila E, Auckland LD, Roundy CM, et al.  
198 Natural SARS-CoV-2 infections, including virus isolation, among serially tested cats and  
199 dogs in households with confirmed human COVID-19 cases in Texas, USA. 2020.
- 200 15. Perera RAPM, Ko R, Tsang OTY, Hui DSC, Kwan MYM, Brackman CJ, et al.  
201 Evaluation of a SARS-CoV-2 Surrogate Virus Neutralization Test for Detection of Antibody in  
202 Human, Canine, Cat, and Hamster Sera. *Journal of Clinical Microbiology*. 2020;59(2). doi:  
203 10.1128/jcm.02504-20.
- 204 16. Tan CW, Chia WN, Qin X, Liu P, Chen MIC, Tiu C, et al. A SARS-CoV-2 surrogate  
205 virus neutralization test based on antibody-mediated blockage of ACE2–spike protein–  
206 protein interaction. *Nat Biotech*. 2020;38(9):1073-8. doi: 10.1038/s41587-020-0631-z.
- 207



208 **Figure 1. Percent inhibition against SARS-COV-2 receptor binding-domain (RBD) in**  
209 **serum of domestic cats whose owners had a history of COVID-19 (n = 41).**

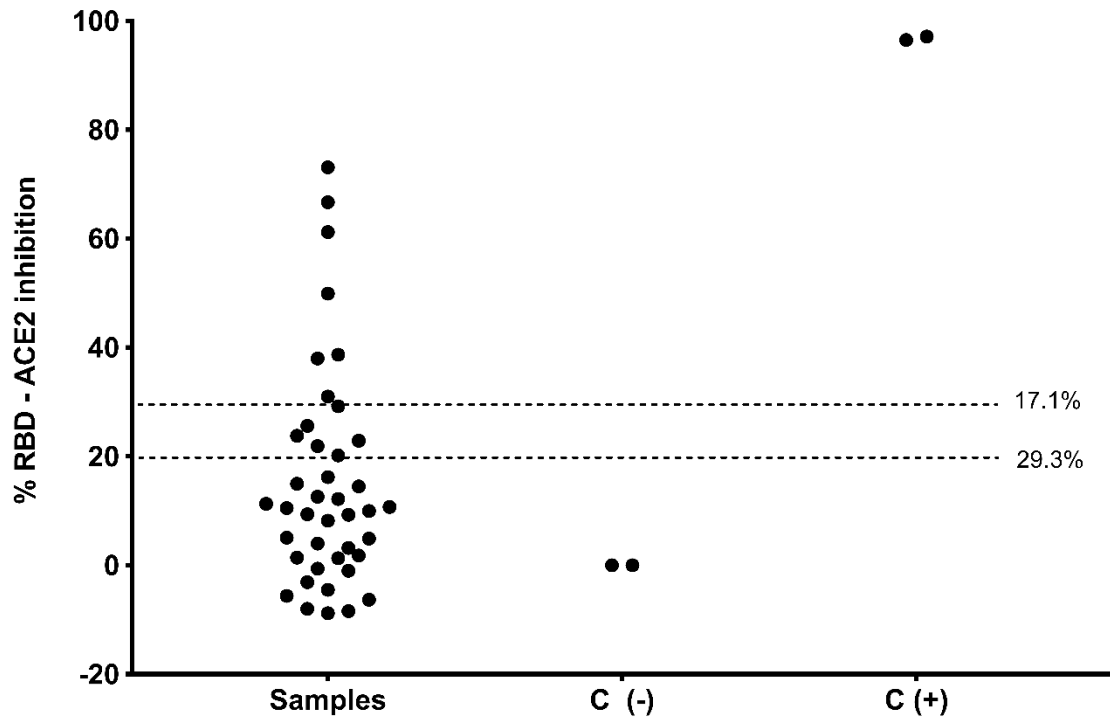

210

211 C: controls, (-): negative, (+): positive. The 17.1% and 29.3% shows the frequency of cats  
212 with neutralizing antibodies with 30% and 20% of cut-off values of inhibition, respectively.

213

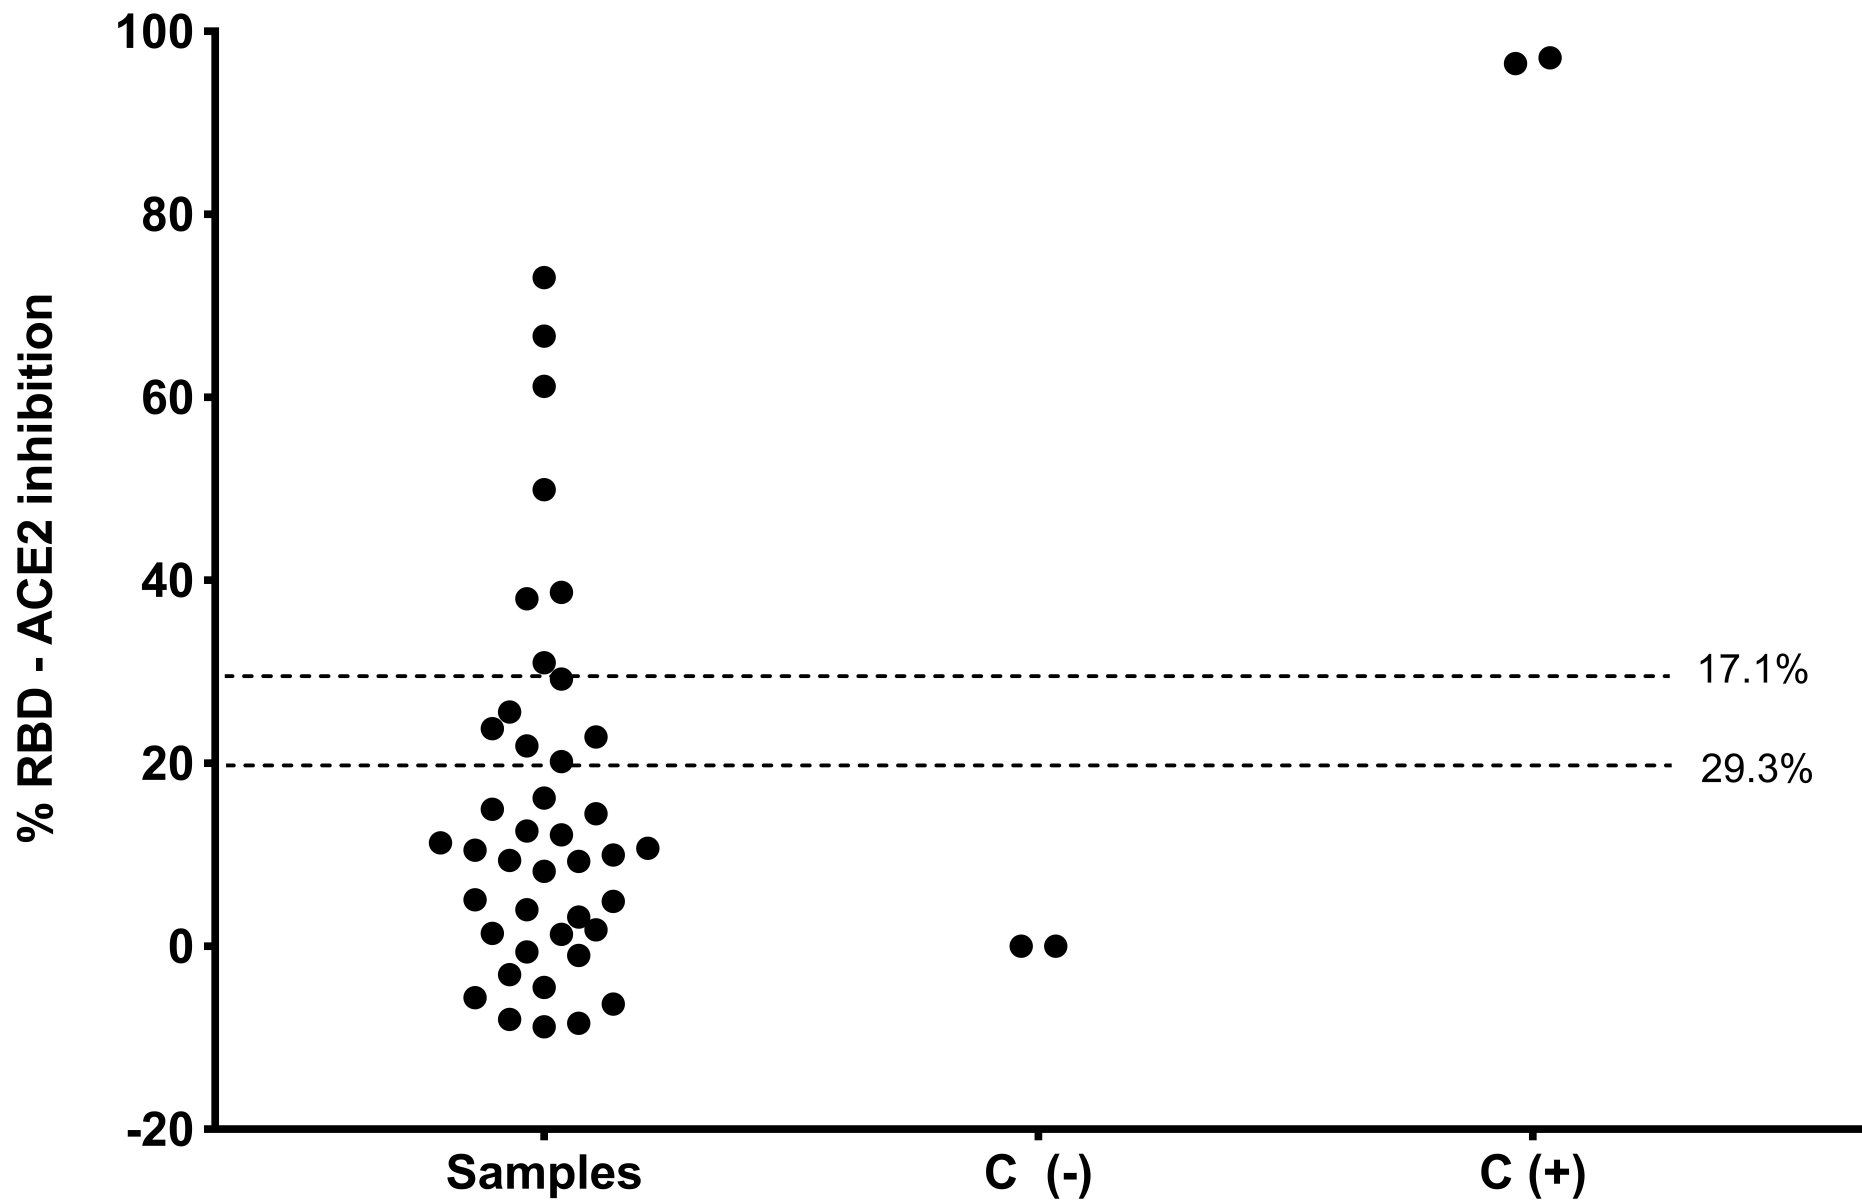

Source: https://biorxiv.org/content/10.1101/2021.05.26.445880v1.full.pdf
